# Supplementary material
Source: HighWire-hosted journal article supplement (https://bmjopenquality.bmj.com/highwire/filestream/141863/field_highwire_adjunct_files/2/bmjoq-2020-001123supp003_data_supplement.pdf)
Supplement: bmjoq-2020-001123supp003_data_supplement.pdf [file bmjoq-2020-001123supp003_data_supplement.pdf]

### DVT patient pathway from Radiology Monday to Friday 8am to 5pm

GP referred outpatients with confirmed DVT on US  
both above or below knee

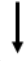

Radiologist can page Thrombosis Physician to avoid sending patient to ED

**Pager number 33322**

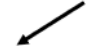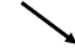

Same day Thrombosis Clinic appointment is  
**available**

same day Thrombosis Clinic appointment is  
**not available (rare)**

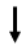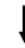

Patient goes upstairs to the Thrombosis Clinic

Patient goes to ED for assessment and treatment

\*give patient Thrombosis Clinic info sheet
